# Supplementary material for: Survival Benefit of Surgical Treatment for Elderly Patients with Intrahepatic Cholangiocarcinoma: A Retrospective Cohort Study in the SEER Database by Propensity Score Matching Analysis
Source: MDPI journal article supplement (doi:10.3390/curroncol30030201), 2023-02-22
Supplement: s1 [file s1]

TableS1 The proportion of TNM stages for TNM I-IV, unmatched TNM I-IIIB and matched  
TNM I-IIIB for ICC patients.

TableS2 Characteristics of ICC patients above 65 years old before and after propensity score  
matching

TableS3 Characteristics of ICC patients above 70 years old before and after propensity score  
matching

TableS4 Characteristics of ICC patients above 75 years old before and after propensity score  
matching

TableS5 Estimated 3-month and 6-month survival rates of surgery and non-surgery groups  
for M0 stage ICC patients in different age stratification

TableS6 Estimated 3-month and 6-month survival rates of surgery and non-surgery groups  
for N0 stage ICC patients in different age stratification

TableS7 Estimated 3-month and 6-month survival rates of surgery and non-surgery groups  
for N1 stage ICC patients in different age stratification

TableS8 Univariate and multivariate cox results table for above 60 years old patients of ICC  
for overall survival

TableS9 Univariate and multivariate cox results table for above 65 years old patients of ICC  
for overall survival

TableS10 Univariate and multivariate cox results table for above 70 years old patients of ICC  
for overall survival

TableS11 Univariate and multivariate cox results table for above 75 years old patients of ICC  
for overall survival

TableS12 Univariate and multivariate cox results table for above 60 years old patients of ICC  
for cancer-specific survival

TableS13 Univariate and multivariate cox results table for above 65 years old patients of ICC  
for cancer-specific survival

TableS14 Univariate and multivariate cox results table for above 70 years old patients of ICC  
for cancer-specific survival

TableS15 Univariate and multivariate cox results table for above 75 years old patients of ICC  
for cancer-specific survival

TableS16 Estimated 2-year survival rates of surgery and non-surgery groups for ICC patients  
above 80 years old

TableS17 Estimated 3-month and 6-month survival rates of surgery and non-surgery groups  
for ICC patients above 80 years old

FigureS1 Flowchart of Patient Selection.

FigureS2 Forest plot and summary statistics of the surgery influence on intrahepatic  
cholangiocarcinoma incidence for OS in ICC.

FigureS3 Forest plot and summary statistics of the surgery influence on intrahepatic  
cholangiocarcinoma incidence for CSS in ICC.

TableS1 The proportion of TNM stages for TNM I-IV, unmatched TNM I-III B and matched TNM I-III B for ICC patients.

| TNM Distribution      | Non-Surgery | Surgery    | P-value |       |
|-----------------------|-------------|------------|---------|-------|
| TNM I-IV              |             |            | <0.001  | 1.026 |
| IA                    | 54 (5.6)    | 79 (21.1)  |         |       |
| IB                    | 85 (8.8)    | 48 (12.8)  |         |       |
| II                    | 212 (21.9)  | 107 (28.5) |         |       |
| IIIA                  | 8 (0.8)     | 6 (1.6)    |         |       |
| IIIB                  | 173 (17.8)  | 109 (29.1) |         |       |
| IV                    |             |            |         |       |
| Unmatched TNM I-III B |             |            | <0.001  | 0.357 |
| IA                    | 54 (10.2)   | 79 (22.6)  |         |       |
| IB                    | 85 (16.0)   | 48 (13.8)  |         |       |
| II                    | 212 (39.8)  | 107 (30.7) |         |       |
| IIIA                  | 8 (1.5)     | 6 (1.7)    |         |       |
| IIIB                  | 173 (32.5)  | 109 (31.2) |         |       |
| Matched TNM I-III B   |             |            | 0.398   | 0.181 |
| IA                    | 31 (12.4)   | 46 (18.5)  |         |       |
| IB                    | 37 (14.9)   | 33 (13.3)  |         |       |
| II                    | 97 (39.0)   | 85 (34.1)  |         |       |
| IIIA                  | 6 (2.4)     | 5 (2.0)    |         |       |
| IIIB                  | 78 (31.3)   | 80 (32.1)  |         |       |

Abbreviations: ICC, intrahepatic cholangiocarcinoma; TNM, tumor node metastasis.

TableS2 Characteristics of ICC patients above 65 years old before and after propensity score matching (continued)

| Characteristic          | Unmatched  |             |            |         | Matched    |             |            |         |
|-------------------------|------------|-------------|------------|---------|------------|-------------|------------|---------|
|                         | ALL        | Non-surgery | Surgery    | P-value | ALL        | Non-surgery | Surgery    | P-value |
|                         | (n=619)    | (n=416)     | (n=253)    |         | (n=388)    | (n=194)     | (n=194)    |         |
| Age, years              | 73.7±6.44  | 74.5±6.84   | 72.3±5.49  | <0.001  | 72.5±5.46  | 72.5±5.61   | 72.6±5.31  | 0.809   |
| Gender                  |            |             |            | 0.202   |            |             |            | 1.000   |
| Female                  | 353(52.8%) | 228(54.8%)  | 125(49.4%) |         | 198(51.0%) | 99(51.0%)   | 99(51.0%)  |         |
| Male                    | 316(47.2%) | 188(45.2%)  | 128(50.6%) |         | 190(49.0%) | 95(49.0%)   | 95(49.0%)  |         |
| Ethnicity               |            |             |            | 0.912   |            |             |            | 1.000   |
| White                   | 534(79.8%) | 331(79.6%)  | 203(80.2%) |         | 313(80.7%) | 156(80.4%)  | 157(80.9%) |         |
| Non-white               | 135(20.2%) | 85(20.4%)   | 50(19.8%)  |         | 75(19.3%)  | 38(19.6%)   | 37(19.1%)  |         |
| Grade                   |            |             |            | 0.014   |            |             |            | 0.751   |
| Well-moderately         | 392(58.6%) | 228(54.8%)  | 164(64.8%) |         | 248(63.9%) | 122(62.9%)  | 126(64.9%) |         |
| Poorly-undifferentially | 277(41.4%) | 188(45.2%)  | 89(35.2%)  |         | 140(36.1%) | 72(37.1%)   | 68(35.1%)  |         |
| TNM stage               |            |             |            | 0.001   |            |             |            | 0.059   |
| IA                      | 97(14.5%)  | 42(10.1%)   | 55(21.7%)  |         | 59(15.2%)  | 21(10.8%)   | 38(19.6%)  |         |
| IB                      | 109(16.3%) | 76(18.3%)   | 33(13.0%)  |         | 62(16.0%)  | 35(18.0%)   | 27(13.9%)  |         |
| II                      | 240(35.9%) | 161(38.7%)  | 79(31.2%)  |         | 136(35.1%) | 77(39.7%)   | 59(30.4%)  |         |
| IIIA                    | 11(1.64%)  | 6(1.44%)    | 5(1.98%)   |         | 9(2.32%)   | 4(2.06%)    | 5(2.58%)   |         |
| IIIB                    | 212(31.7%) | 131(31.5%)  | 81(32.0%)  |         | 122(31.4%) | 57(29.4%)   | 65(33.5%)  |         |
| Chemotherapy            |            |             |            | 0.019   |            |             |            | 0.835   |
| No                      | 386(57.7%) | 225(54.1%)  | 161(63.6%) |         | 239(61.6%) | 121(62.4%)  | 118(60.8%) |         |
| Yes                     | 283(42.3%) | 191(45.9%)  | 92(36.4%)  |         | 149(38.4%) | 73(37.6%)   | 76(39.2%)  |         |
| Radiotherapy            |            |             |            | 0.009   |            |             |            | 1.000   |
| No                      | 550(82.2%) | 329(79.1%)  | 221(87.4%) |         | 331(85.3%) | 165(85.1%)  | 166(85.6%) |         |
| Yes                     | 119(17.8%) | 87(20.9%)   | 32(12.6%)  |         | 57(14.7%)  | 29(14.9%)   | 28(14.4%)  |         |

Abbreviations: ICC, intrahepatic cholangiocarcinoma; TNM, tumor node metastasis.

TableS3 Characteristics of ICC patients above 70 years old before and after propensity score matching (continued)

| Characteristic          | Unmatched      |                        |                    |         | Matched        |                        |                    |         |
|-------------------------|----------------|------------------------|--------------------|---------|----------------|------------------------|--------------------|---------|
|                         | ALL<br>(n=454) | Non-surgery<br>(n=296) | Surgery<br>(n=158) | P-value | ALL<br>(n=284) | Non-surgery<br>(n=142) | Surgery<br>(n=142) | P-value |
| Age, years              | 76.8±5.45      | 77.5±5.80              | 75.5±4.46          | <0.001  | 75.9±4.75      | 75.8±5.04              | 76.0±4.46          | 0.813   |
| Gender                  |                |                        |                    | 0.077   |                |                        |                    | 1.000   |
| Female                  | 237(52.2%)     | 164(55.4%)             | 73(46.2%)          |         | 137(48.2%)     | 68(47.9%)              | 69(48.6%)          |         |
| Male                    | 217(47.8%)     | 132(44.6%)             | 85(53.8%)          |         | 147(51.8%)     | 74(52.1%)              | 73(51.4%)          |         |
| Ethnicity               |                |                        |                    | 0.693   |                |                        |                    | 1.000   |
| White                   | 368(81.1%)     | 242(81.8%)             | 126(79.7%)         |         | 230(81.0%)     | 115(81.0%)             | 115(81.0%)         |         |
| Non-white               | 86(18.9%)      | 54(18.2%)              | 32(20.3%)          |         | 54(19.0%)      | 27(19.0%)              | 27(19.0%)          |         |
| Grade                   |                |                        |                    | 0.02    |                |                        |                    | 0.713   |
| Well-moderately         | 261(57.5%)     | 158(53.4%)             | 103(65.2%)         |         | 178(62.7%)     | 91(64.1%)              | 87(61.3%)          |         |
| Poorly-undifferentially | 193(42.5%)     | 138(46.6%)             | 55(34.8%)          |         | 106(37.3%)     | 51(35.9%)              | 55(38.7%)          |         |
| TNM stage               |                |                        |                    | 0.015   |                |                        |                    | 0.088   |
| IA                      | 68(15.0%)      | 32(10.8%)              | 36(22.8%)          |         | 43(15.1%)      | 15(10.6%)              | 28(19.7%)          |         |
| IB                      | 82(18.1%)      | 58(19.6%)              | 24(15.2%)          |         | 50(17.6%)      | 29(20.4%)              | 21(14.8%)          |         |
| II                      | 162(35.7%)     | 111(37.5%)             | 51(32.3%)          |         | 108(38.0%)     | 60(42.3%)              | 48(33.8%)          |         |
| IIIA                    | 6(1.32%)       | 5(1.69%)               | 1(0.63%)           |         | 3(1.06%)       | 2(1.41%)               | 1(0.70%)           |         |
| IIIB                    | 136(30.0%)     | 90(30.4%)              | 46(29.1%)          |         | 80(28.2%)      | 36(25.4%)              | 44(31.0%)          |         |
| Chemotherapy            |                |                        |                    | 0.004   |                |                        |                    | 0.613   |
| No                      | 285(62.8%)     | 171(57.8%)             | 114(72.2%)         |         | 191(67.3%)     | 93(65.5%)              | 98(69.0%)          |         |
| Yes                     | 169(37.2%)     | 125(42.2%)             | 44(27.8%)          |         | 93(32.7%)      | 49(34.5%)              | 44(31.0%)          |         |
| Radiotherapy            |                |                        |                    | <0.001  |                |                        |                    | 1.000   |
| No                      | 373(82.2%)     | 229(77.4%)             | 144(91.1%)         |         | 255(89.8%)     | 127(89.4%)             | 128(90.1%)         |         |
| Yes                     | 81(17.8%)      | 67(22.6%)              | 14(8.86%)          |         | 29(10.2%)      | 15(10.6%)              | 14(9.86%)          |         |

Abbreviations: ICC, intrahepatic cholangiocarcinoma; TNM, tumor node metastasis.

TableS4 Characteristics of ICC patients above 75 years old before and after propensity score matching (continued)

| Characteristic          | Unmatched               |                                 |                            | <i>P</i> -value | Matched                 |                                |                            | <i>P</i> -value |
|-------------------------|-------------------------|---------------------------------|----------------------------|-----------------|-------------------------|--------------------------------|----------------------------|-----------------|
|                         | ALL<br>( <i>n</i> =272) | Non-surgery<br>( <i>n</i> =189) | Surgery<br>( <i>n</i> =83) |                 | ALL<br>( <i>n</i> =152) | Non-surgery<br>( <i>n</i> =76) | Surgery<br>( <i>n</i> =76) |                 |
| Age, years              | 80.1±4.52               | 80.6±4.85                       | 78.9±3.40                  | 0.001           | 79.4±4.07               | 79.8±4.58                      | 79.1±3.48                  | 0.311           |
| Gender                  |                         |                                 |                            | 0.353           |                         |                                |                            | 0.871           |
| Female                  | 154(56.6%)              | 111(58.7%)                      | 43(51.8%)                  |                 | 82(53.9%)               | 40(52.6%)                      | 42(55.3%)                  |                 |
| Male                    | 118(43.4%)              | 78(41.3%)                       | 40(48.2%)                  |                 | 70(46.1%)               | 36(47.4%)                      | 34(44.7%)                  |                 |
| Ethnicity               |                         |                                 |                            | 0.432           |                         |                                |                            | 0.364           |
| White                   | 216(79.4%)              | 153(81.0%)                      | 63(75.9%)                  |                 | 110(72.4%)              | 52(68.4%)                      | 58(76.3%)                  |                 |
| Non-white               | 56(20.6%)               | 36(19.0%)                       | 20(24.1%)                  |                 | 42(27.6%)               | 24(31.6%)                      | 18(23.7%)                  |                 |
| Grade                   |                         |                                 |                            | 0.015           |                         |                                |                            | 0.86            |
| Well-moderately         | 169(62.1%)              | 108(57.1%)                      | 61(73.5%)                  |                 | 106(69.7%)              | 52(68.4%)                      | 54(71.1%)                  |                 |
| Poorly-undifferentially | 103(37.9%)              | 81(42.9%)                       | 22(26.5%)                  |                 | 46(30.3%)               | 24(31.6%)                      | 22(28.9%)                  |                 |
| TNM stage               |                         |                                 |                            | 0.28            |                         |                                |                            | 0.381           |
| IA                      | 43(15.8%)               | 24(12.7%)                       | 19(22.9%)                  |                 | 22(14.5%)               | 7(9.21%)                       | 15(19.7%)                  |                 |
| IB                      | 56(20.6%)               | 42(22.2%)                       | 14(16.9%)                  |                 | 30(19.7%)               | 17(22.4%)                      | 13(17.1%)                  |                 |
| II                      | 89(32.7%)               | 63(33.3%)                       | 26(31.3%)                  |                 | 55(36.2%)               | 30(39.5%)                      | 25(32.9%)                  |                 |
| IIIA                    | 3(1.10%)                | 2(1.06%)                        | 1(1.20%)                   |                 | 2(1.32%)                | 1(1.32%)                       | 1(1.32%)                   |                 |
| IIIB                    | 81(29.8%)               | 58(30.7%)                       | 23(27.7%)                  |                 | 43(28.3%)               | 21(27.6%)                      | 22(28.9%)                  |                 |
| Chemotherapy            |                         |                                 |                            | 0.001           |                         |                                |                            | 1               |
| No                      | 193(71.0%)              | 122(64.6%)                      | 71(85.5%)                  |                 | 128(84.2%)              | 64(84.2%)                      | 64(84.2%)                  |                 |
| Yes                     | 79(29.0%)               | 67(35.4%)                       | 12(14.5%)                  |                 | 24(15.8%)               | 12(15.8%)                      | 12(15.8%)                  |                 |
| Radiotherapy            |                         |                                 |                            | 0.001           |                         |                                |                            | 0.442           |
| No                      | 222(81.6%)              | 144(76.2%)                      | 78(94.0%)                  |                 | 145(95.4%)              | 74(97.4%)                      | 71(93.4%)                  |                 |
| Yes                     | 50(18.4%)               | 45(23.8%)                       | 5(6.02%)                   |                 | 7(4.61%)                | 2(2.63%)                       | 5(6.58%)                   |                 |

Abbreviations: ICC, intrahepatic cholangiocarcinoma; TNM, tumor node metastasis.

TableS5 Estimated 3-month and 6-month survival rates of surgery and non-surgery groups for M0 stage ICC patients in different age stratification

|                     |  | Above 60 years old        |                 |                           |                  | Above 65 years old        |                  |                           |                  | Above 70 years old        |                  |                           |                  | Above 75 years old        |                  |                           |                  |
|---------------------|--|---------------------------|-----------------|---------------------------|------------------|---------------------------|------------------|---------------------------|------------------|---------------------------|------------------|---------------------------|------------------|---------------------------|------------------|---------------------------|------------------|
|                     |  | 3-Month                   |                 | 6-Month                   |                  | 3-Month                   |                  | 6-Month                   |                  | 3-Month                   |                  | 6-Month                   |                  | 3-Month                   |                  | 6-Month                   |                  |
|                     |  | Estimat<br>ed rate<br>(%) | P-<br>valu<br>e | Estimat<br>ed rate<br>(%) | P -<br>valu<br>e |
| OS                  |  |                           | <0.0<br>01      |                           | <0.0<br>01       |                           | <0.0<br>01       |                           | <0.0<br>01       |                           | <0.0<br>01       |                           | <0.0<br>01       |                           | <0.0<br>01       |                           | <0.0<br>01       |
| Non-<br>surge<br>ry |  | 67.7(62.<br>2-73.8)       |                 | 53.8(48.<br>0-60.5)       |                  | 62.1(55.<br>7-69.4)       |                  | 48.4(41.<br>8-56.1)       |                  | 59.5(51.<br>9-68.2)       |                  | 45.2(37.<br>6-54.2)       |                  | 47.8(37.<br>7-60.7)       |                  | 35.5(26.<br>1-48.3)       |                  |
| Surge<br>ry         |  | 95.2(0.9<br>26-<br>0.979) |                 | 86.7(82.<br>6-91.0)       |                  | 93.3(89.<br>8-96.9)       |                  | 84.5(79.<br>6-89.8)       |                  | 92.3(88.<br>0-96.8)       |                  | 82.4(76.<br>4-88.9)       |                  | 92.1(86.<br>2-98.4)       |                  | 80.3(71.<br>8-89.7)       |                  |
| CSS                 |  |                           | <0.0<br>01      |                           | <0.0<br>01       |                           | <0.0<br>01       |                           | <0.0<br>01       |                           | <0.0<br>01       |                           | <0.0<br>01       |                           | <0.0<br>01       |                           | <0.0<br>01       |
| Non-<br>surge<br>ry |  | 68.1(62.<br>5-74.1)       |                 | 54.9(49.<br>0-61.5)       |                  | 62.6(56.<br>1-69.8)       |                  | 50.3(43.<br>7-57.9)       |                  | 61.3(53.<br>8-70.0)       |                  | 47.3(39.<br>7-56.5)       |                  | 51.3(41.<br>0-64.1)       |                  | 43.7(33.<br>5-56.9)       |                  |
| Surge<br>ry         |  | 95.6(93.<br>0-98.2)       |                 | 87.9(83.<br>9-92.0)       |                  | 93.8(90.<br>4-97.3)       |                  | 85.5(80.<br>7-90.6)       |                  | 92.9(88.<br>8-97.2)       |                  | 84.4(78.<br>6-90.1)       |                  | 92.1(86.<br>2-98.4)       |                  | 80.3(71.<br>8-89.7)       |                  |



TableS6 Estimated 3-month and 6-month survival rates of surgery and non-surgery groups for N0 stage ICC patients in different age stratification

|                     |  | Above 60 years old        |                 |                           |                  | Above 65 years old        |                  |                           |                  | Above 70 years old        |                  |                           |                  | Above 75 years old        |                  |                           |                  |
|---------------------|--|---------------------------|-----------------|---------------------------|------------------|---------------------------|------------------|---------------------------|------------------|---------------------------|------------------|---------------------------|------------------|---------------------------|------------------|---------------------------|------------------|
|                     |  | 3-Month                   |                 | 6-Month                   |                  | 3-Month                   |                  | 6-Month                   |                  | 3-Month                   |                  | 6-Month                   |                  | 3-Month                   |                  | 6-Month                   |                  |
|                     |  | Estimat<br>ed rate<br>(%) | P-<br>valu<br>e | Estimat<br>ed rate<br>(%) | P -<br>valu<br>e |
| OS                  |  |                           | <0.0<br>01      |                           | <0.0<br>01       |                           | <0.0<br>01       |                           | <0.0<br>01       |                           | <0.0<br>01       |                           | <0.0<br>01       |                           | <0.0<br>01       |                           | <0.0<br>01       |
| Non-<br>surge<br>ry |  | 64.6(59.<br>0-70.9)       |                 | 54.1(48.<br>3-60.7)       |                  | 61.3(54.<br>8-68.7)       |                  | 47.5(40.<br>8-55.2)       |                  | 62.6(54.<br>2-72.4)       |                  | 50.6(42.<br>0-60.9)       |                  | 50.4(39.<br>3-64.8)       |                  | 38.7(28.<br>1-53.2)       |                  |
| Surge<br>ry         |  | 96.4(94.<br>1-98.7)       |                 | 90.0(86.<br>3-93.8)       |                  | 95.8(93.<br>0-98.7)       |                  | 87.9(83.<br>3-92.6)       |                  | 94.5(90.<br>4-98.9)       |                  | 86.4(80.<br>2-93.0)       |                  | 93.4(87.<br>4-99.9)       |                  | 85.2(76.<br>8-94.6)       |                  |
| CSS                 |  |                           | <0.0<br>01      |                           | <0.0<br>01       |                           | <0.0<br>01       |                           | <0.0<br>01       |                           | <0.0<br>01       |                           | <0.0<br>01       |                           | <0.0<br>01       |                           | <0.0<br>01       |
| Non-<br>surge<br>ry |  | 65.0(59.<br>4-71.2)       |                 | 56.0(50.<br>2-62.6)       |                  | 61.3(54.<br>8-68.7)       |                  | 49.5(42.<br>8-57.2)       |                  | 62.6(54.<br>2-72.4)       |                  | 53.2(44.<br>6-63.5)       |                  | 50.4(39.<br>3-64.8)       |                  | 40.1(29.<br>4-54.7)       |                  |
| Surge<br>ry         |  | 96.8(94.<br>6-99.0)       |                 | 91.1(87.<br>7-94.7)       |                  | 96.3(93.<br>6-99.0)       |                  | 89.4(85.<br>1-93.9)       |                  | 94.5(90.<br>4-98.9)       |                  | 87.3(81.<br>3-93.7)       |                  | 93.4(87.<br>4-99.9)       |                  | 85.2(76.<br>8-94.6)       |                  |

TableS7 Estimated 3-month and 6-month survival rates of surgery and non-surgery groups for N1 stage ICC patients in different age stratification

|             |  | Above 60 years old |        |                 |        | Above 65 years old |        |                 |        | Above 70 years old |        |                 |        | Above 75 years old |        |                 |        |
|-------------|--|--------------------|--------|-----------------|--------|--------------------|--------|-----------------|--------|--------------------|--------|-----------------|--------|--------------------|--------|-----------------|--------|
|             |  | 3-Month            |        | 6-Month         |        | 3-Month            |        | 6-Month         |        | 3-Month            |        | 6-Month         |        | 3-Month            |        | 6-Month         |        |
|             |  | Estimat            | P-     | Estimat         | P -    | Estimat            | P -    | Estimat         | P -    | Estimat            | P -    | Estimat         | P -    | Estimat            | P -    | Estimat         | P -    |
|             |  | ed rate            | valu   | ed rate         | valu   | ed rate            | valu   | ed rate         | valu   | ed rate            | valu   | ed rate         | valu   | ed rate            | valu   | ed rate         | valu   |
|             |  | (%)                | e      | (%)             | e      |
| OS          |  |                    | <0.001 |                 | <0.001 |                    | <0.001 |                 | <0.001 |                    | <0.001 |                 | <0.001 |                    | <0.001 |                 | <0.001 |
| Non-surgery |  | 63.4(53.0-76.0)    |        | 57.5(46.8-70.5) |        | 57.6(45.1-73.6)    |        | 51.0(38.5-67.6) |        | 59.7(48.8-73.0)    |        | 47.1(36.3-61.1) |        | 55.2(41.7-72.9)    |        | 42.6(29.7-61.1) |        |
| Surge ry    |  | 88.4(81.2-96.3)    |        | 73.7(64.0-84.9) |        | 85.4(76.0-96.0)    |        | 75.0(63.7-88.3) |        | 86.2(74.5-99.7)    |        | 72.4(57.8-90.7) |        | 78.6(59.8-100.0)   |        | 64.3(43.5-95.0) |        |
| CSS         |  |                    | <0.001 |                 | <0.001 |                    | <0.001 |                 | <0.001 |                    | <0.001 |                 | <0.001 |                    | <0.001 |                 | <0.001 |
| Non-surgery |  | 67.2(56.8-79.5)    |        | 60.9(50.1-73.9) |        | 63.0(50.5-78.7)    |        | 58.3(45.5-74.6) |        | 64.7(53.8-77.8)    |        | 52.8(41.6-67.0) |        | 63.2(49.5-80.7)    |        | 51.7(37.8-70.8) |        |
| Surge ry    |  | 88.4(81.2-96.3)    |        | 75.1(65.5-86.1) |        | 85.4(76.0-96.0)    |        | 77.0(65.9-89.9) |        | 86.2(74.5-99.7)    |        | 75.6(61.3-93.1) |        | 78.6(59.8-100.0)   |        | 64.3(43.5-95.0) |        |

TableS8 Univariate and multivariate cox results table for above 60 years old patients of ICC for overall survival

|                 | No event      | Event         | Univariable                |                | Multivariable              |                |
|-----------------|---------------|---------------|----------------------------|----------------|----------------------------|----------------|
|                 | <i>N</i> =152 | <i>N</i> =346 | <i>HR</i> (95% <i>CI</i> ) | <i>p-value</i> | <i>HR</i> (95% <i>CI</i> ) | <i>p-value</i> |
| TNM:            |               |               |                            |                |                            |                |
| IA              | 41 (27.0%)    | 36 (10.4%)    | Ref.                       | Ref.           | Ref.                       | Ref.           |
| IB              | 24 (15.8%)    | 46 (13.3%)    | 1.76 [1.14;2.73]           | 0.011          | 1.40[0.90;2.17]            | 0.136          |
| II              | 48 (31.6%)    | 134 (38.7%)   | 2.29 [1.58;3.32]           | <0.001         | 2.24[1.55;3.25]            | <0.001         |
| IIIA            | 3 (1.97%)     | 8 (2.31%)     | 2.22 [1.03;4.79]           | 0.041          | 1.68[0.78;3.64]            | 0.186          |
| IIIB            | 36 (23.7%)    | 122 (35.3%)   | 2.58 [1.78;3.75]           | <0.001         | 2.68[1.83;3.91]            | <0.001         |
| Radiotherapy:   |               |               |                            |                |                            |                |
| No              | 125 (82.2%)   | 305 (88.2%)   | Ref.                       | Ref.           | Ref.                       | Ref.           |
| Yes             | 27 (17.8%)    | 41 (11.8%)    | 0.68 [0.49;0.94]           | 0.02           | 0.71[0.51;0.99]            | 0.043          |
| Chemotherapy:   |               |               |                            |                |                            |                |
| No              | 77 (50.7%)    | 196 (56.6%)   | Ref.                       | Ref.           | Ref.                       | Ref.           |
| Yes             | 75 (49.3%)    | 150 (43.4%)   | 0.70 [0.56;0.87]           | 0.001          | 0.51[0.40;0.64]            | <0.001         |
| Grade:          |               |               |                            |                |                            |                |
| Well-Moderately | 103 (67.8%)   | 203 (58.7%)   | Ref.                       | Ref.           | Ref.                       | Ref.           |

|                         |             |             |                  |        |                  |        |
|-------------------------|-------------|-------------|------------------|--------|------------------|--------|
| Poorly-Undifferentially | 49 (32.2%)  | 143 (41.3%) | 1.26 [1.02;1.56] | 0.034  | 1.28[1.03;1.59]  | 0.024  |
| Gender:                 |             |             |                  |        |                  |        |
| Female                  | 73 (48.0%)  | 185 (53.5%) | Ref.             | Ref.   |                  |        |
| Male                    | 79 (52.0%)  | 161 (46.5%) | 0.95 [0.77;1.18] | 0.661  |                  |        |
| Surgery:                |             |             |                  |        |                  |        |
| No                      | 32 (21.1%)  | 217 (62.7%) | Ref.             | Ref.   | Ref.             | Ref.   |
| Yes                     | 120 (78.9%) | 129 (37.3%) | 0.28 [0.22;0.35] | <0.001 | 0.258[0.21;0.32] | <0.001 |
| Race:                   |             |             |                  |        |                  |        |
| White                   | 127 (83.6%) | 269 (77.7%) | Ref.             | Ref.   |                  |        |
| Non-White               | 25 (16.4%)  | 77 (22.3%)  | 1.24 [0.96;1.60] | 0.094  |                  |        |

---

TableS9 Univariate and multivariate cox results table for above 65 years old patients of ICC for overall survival

|                         | No event      | Event         | Univariable                |                | Multivariable              |                |
|-------------------------|---------------|---------------|----------------------------|----------------|----------------------------|----------------|
|                         | <i>N</i> =115 | <i>N</i> =273 | <i>HR</i> (95% <i>CI</i> ) | <i>p-value</i> | <i>HR</i> (95% <i>CI</i> ) | <i>p-value</i> |
| TNM:                    |               |               |                            |                |                            |                |
| IA                      | 30 (26.1%)    | 29 (10.6%)    | Ref.                       | Ref.           | Ref.                       | Ref.           |
| IB                      | 19 (16.5%)    | 43 (15.8%)    | 1.69 [1.06;2.71]           | 0.011          | 1.40[0.87;2.26]            | 0.163          |
| II                      | 35 (30.4%)    | 101 (37.0%)   | 2.18 [1.44;3.30]           | <0.001         | 1.99[1.31;3.04]            | 0.001          |
| IIIA                    | 2 (1.74%)     | 7 (2.56%)     | 2.13 [0.93;4.87]           | 0.041          | 1.30[0.56;3.02]            | 0.537          |
| IIIB                    | 29 (25.2%)    | 93 (34.1%)    | 2.31 [1.52;3.52]           | <0.001         | 2.52[1.64;3.88]            | <0.001         |
| Radiotherapy:           |               |               |                            |                |                            |                |
| No                      | 89 (77.4%)    | 242 (88.6%)   | Ref.                       | Ref.           | Ref.                       | Ref.           |
| Yes                     | 26 (22.6%)    | 31 (11.4%)    | 0.53 [0.36;0.77]           | 0.001          | 0.51[0.35;0.75]            | <0.001         |
| Chemotherapy:           |               |               |                            |                |                            |                |
| No                      | 62 (53.9%)    | 177 (64.8%)   | Ref.                       | Ref.           | Ref.                       | Ref.           |
| Yes                     | 53 (46.1%)    | 96 (35.2%)    | 0.60 [0.47;0.77]           | <0.001         | 0.40[0.31;0.53]            | <0.001         |
| Grade:                  |               |               |                            |                |                            |                |
| Well-Moderately         | 81 (70.4%)    | 167 (61.2%)   | Ref.                       | Ref.           | Ref.                       | Ref.           |
| Poorly-Undifferentially | 34 (29.6%)    | 106 (38.8%)   | 1.42 [1.11;1.81]           | 0.005          | 1.54[1.20;1.98]            | <0.001         |
| Gender:                 |               |               |                            |                |                            |                |

|           |            |             |                  |        |                  |        |
|-----------|------------|-------------|------------------|--------|------------------|--------|
| Female    | 58 (50.4%) | 140 (51.3%) | Ref.             | Ref.   |                  |        |
| Male      | 57 (49.6%) | 133 (48.7%) | 1.08 [0.85;1.38] | 0.506  |                  |        |
| Surgery:  |            |             |                  |        |                  |        |
| No        | 27 (23.5%) | 167 (61.2%) | Ref.             | Ref.   | Ref.             | Ref.   |
| Yes       | 88 (76.5%) | 106 (38.8%) | 0.29 [0.23;0.38] | <0.001 | 0.227[0.17;0.30] | <0.001 |
| Race:     |            |             |                  |        |                  |        |
| White     | 94 (81.7%) | 219 (80.2%) | Ref.             | Ref.   |                  |        |
| Non-White | 21 (18.3%) | 54 (19.8%)  | 1.11 [0.82;1.50] | 0.49   |                  |        |

---



|           |            |             |                  |        |                 |        |
|-----------|------------|-------------|------------------|--------|-----------------|--------|
| Female    | 38 (48.1%) | 99 (48.3%)  | Ref.             | Ref.   |                 |        |
| Male      | 41 (51.9%) | 106 (51.7%) | 1.06 [0.81;1.40] | 0.655  |                 |        |
| Surgery:  |            |             |                  |        |                 |        |
| No        | 17 (21.5%) | 125 (61.0%) | Ref.             | Ref.   | Ref.            | Ref.   |
| Yes       | 62 (78.5%) | 80 (39.0%)  | 0.27 [0.20;0.36] | <0.001 | 0.23[0.17;0.32] | <0.001 |
| Race:     |            |             |                  |        |                 |        |
| White     | 67 (84.8%) | 163 (79.5%) | Ref.             | Ref.   |                 |        |
| Non-White | 12 (15.2%) | 42 (20.5%)  | 1.23 [0.87;1.72] | 0.24   |                 |        |

---



TableS11 Univariate and multivariate cox results table for above 75 years old patients of ICC for overall survival

|                         | No event     | Event         | Univariable                |                | Multivariable              |                |
|-------------------------|--------------|---------------|----------------------------|----------------|----------------------------|----------------|
|                         | <i>N</i> =37 | <i>N</i> =115 | <i>HR</i> (95% <i>CI</i> ) | <i>p-value</i> | <i>HR</i> (95% <i>CI</i> ) | <i>p-value</i> |
| TNM:                    |              |               |                            |                |                            |                |
| IA                      | 11 (29.7%)   | 11 (9.57%)    | Ref.                       | Ref.           | Ref.                       | Ref.           |
| IB                      | 8 (21.6%)    | 22 (19.1%)    | 1.78 [0.86;3.68]           | 0.118          | 1.32[0.64;2.74]            | 0.452          |
| II                      | 10 (27.0%)   | 45 (39.1%)    | 2.50 [1.29;4.85]           | 0.007          | 1.81[0.93;3.54]            | 0.081          |
| IIIA                    | 0 (0.00%)    | 2 (1.74%)     | 2.35 [0.52;10.6]           | 0.268          | 0.77[0.17;3.56]            | 0.737          |
| IIIB                    | 8 (21.6%)    | 35 (30.4%)    | 2.83 [1.42;5.62]           | 0.003          | 2.49[1.24;4.98]            | 0.01           |
| Radiotherapy:           |              |               |                            |                |                            |                |
| No                      | 34 (91.9%)   | 111 (96.5%)   | Ref.                       | Ref.           |                            |                |
| Yes                     | 3 (8.11%)    | 4 (3.48%)     | 0.54 [0.20;1.48]           | 0.232          |                            |                |
| Chemotherapy:           |              |               |                            |                |                            |                |
| No                      | 28 (75.7%)   | 100 (87.0%)   | Ref.                       | Ref.           | Ref.                       | Ref.           |
| Yes                     | 9 (24.3%)    | 15 (13.0%)    | 0.57 [0.33;0.98]           | 0.044          | 0.47[0.27;0.82]            | 0.008          |
| Grade:                  |              |               |                            |                |                            |                |
| Well-Moderately         | 29 (78.4%)   | 77 (67.0%)    | Ref.                       | Ref.           |                            |                |
| Poorly-Undifferentially | 8 (21.6%)    | 38 (33.0%)    | 1.37 [0.93;2.02]           | 0.116          |                            |                |
| Gender:                 |              |               |                            |                |                            |                |

|           |            |            |                  |        |                 |        |
|-----------|------------|------------|------------------|--------|-----------------|--------|
| Female    | 21 (56.8%) | 61 (53.0%) | Ref.             | Ref.   |                 |        |
| Male      | 16 (43.2%) | 54 (47.0%) | 1.11 [0.77;1.60] | 0.579  |                 |        |
| Surgery:  |            |            |                  |        |                 |        |
| No        | 6 (16.2%)  | 70 (60.9%) | Ref.             | Ref.   | Ref.            | Ref.   |
| Yes       | 31 (83.8%) | 45 (39.1%) | 0.24 [0.16;0.36] | <0.001 | 0.22[0.15;0.33] | <0.001 |
| Race:     |            |            |                  |        |                 |        |
| White     | 29 (78.4%) | 81 (70.4%) | Ref.             | Ref.   |                 |        |
| Non-White | 8 (21.6%)  | 34 (29.6%) | 1.42 [0.95;2.13] | 0.085  |                 |        |

---

TableS12 Univariate and multivariate cox results table for above 60 years old patients of ICC for cancer-specific survival

|                         | No event      | Event         | Univariable                |                | Multivariable              |                |
|-------------------------|---------------|---------------|----------------------------|----------------|----------------------------|----------------|
|                         | <i>N</i> =169 | <i>N</i> =329 | <i>HR</i> (95% <i>CI</i> ) | <i>p-value</i> | <i>HR</i> (95% <i>CI</i> ) | <i>p-value</i> |
| TNM:                    |               |               |                            |                |                            |                |
| IA                      | 44 (26.0%)    | 33 (10.0%)    | Ref.                       | Ref.           | Ref.                       | Ref.           |
| IB                      | 26 (15.4%)    | 44 (13.4%)    | 1.84 [1.17;2.88]           | 0.008          | 1.46[0.93;2.30]            | 0.102          |
| II                      | 54 (32.0%)    | 128 (38.9%)   | 2.37 [1.62;3.48]           | <0.001         | 2.31[1.57;3.39]            | <0.001         |
| IIIA                    | 3 (1.78%)     | 8 (2.43%)     | 2.40 [1.11;5.21]           | 0.027          | 1.80[0.83;3.93]            | 0.138          |
| IIIB                    | 42 (24.9%)    | 116 (35.3%)   | 2.65 [1.80;3.92]           | <0.001         | 2.69[1.81;3.99]            | <0.001         |
| Radiotherapy:           |               |               |                            |                |                            |                |
| No                      | 141 (83.4%)   | 289 (87.8%)   | Ref.                       | Ref.           | Ref.                       | Ref.           |
| Yes                     | 28 (16.6%)    | 40 (12.2%)    | 0.70 [0.50;0.98]           | 0.035          | 0.73[0.52;1.02]            | 0.065          |
| Chemotherapy:           |               |               |                            |                |                            |                |
| No                      | 91 (53.8%)    | 182 (55.3%)   | Ref.                       | Ref.           | Ref.                       | Ref.           |
| Yes                     | 78 (46.2%)    | 147 (44.7%)   | 0.74 [0.59;0.92]           | 0.006          | 0.53[0.42;0.68]            | <0.001         |
| Grade:                  |               |               |                            |                |                            |                |
| Well-Moderately         | 116 (68.6%)   | 190 (57.8%)   | Ref.                       | Ref.           | Ref.                       | Ref.           |
| Poorly-Undifferentially | 53 (31.4%)    | 139 (42.2%)   | 1.31 [1.05;1.63]           | 0.017          | 1.33[1.07;1.66]            | 0.011          |
| Gender:                 |               |               |                            |                |                            |                |

|           |             |             |                  |        |                 |        |
|-----------|-------------|-------------|------------------|--------|-----------------|--------|
| Female    | 82 (48.5%)  | 176 (53.5%) | Ref.             | Ref.   |                 |        |
| Male      | 87 (51.5%)  | 153 (46.5%) | 0.95 [0.77;1.18] | 0.663  |                 |        |
| Surgery:  |             |             |                  |        |                 |        |
| No        | 36 (21.3%)  | 213 (64.7%) | Ref.             | Ref.   | Ref.            | Ref.   |
| Yes       | 133 (78.7%) | 116 (35.3%) | 0.26 [0.20;0.32] | <0.001 | 0.24[0.19;0.30] | <0.001 |
| Race:     |             |             |                  |        |                 |        |
| White     | 141 (83.4%) | 255 (77.5%) | Ref.             | Ref.   |                 |        |
| Non-White | 28 (16.6%)  | 74 (22.5%)  | 1.26 [0.97;1.63] | 0.085  |                 |        |

---

TableS13 Univariate and multivariate cox results table for above 65 years old patients of ICC for cancer-specific survival

|                         | No event      | Event         | Univariable                |                | Multivariable              |                |
|-------------------------|---------------|---------------|----------------------------|----------------|----------------------------|----------------|
|                         | <i>N</i> =130 | <i>N</i> =258 | <i>HR</i> (95% <i>CI</i> ) | <i>p-value</i> | <i>HR</i> (95% <i>CI</i> ) | <i>p-value</i> |
| TNM:                    |               |               |                            |                |                            |                |
| IA                      | 33 (25.4%)    | 26 (10.1%)    | Ref.                       | Ref.           | Ref.                       | Ref.           |
| IB                      | 22 (16.9%)    | 40 (15.5%)    | 1.75 [1.07;2.87]           | 0.026          | 1.46[0.89;2.41]            | 0.138          |
| II                      | 41 (31.5%)    | 95 (36.8%)    | 2.28 [1.48;3.52]           | <0.001         | 2.08[1.34;3.24]            | 0.001          |
| IIIA                    | 2 (1.54%)     | 7 (2.71%)     | 2.36 [1.02;5.44]           | 0.044          | 1.44[0.61;3.36]            | 0.404          |
| IIIB                    | 32 (24.6%)    | 90 (34.9%)    | 2.48 [1.60;3.85]           | <0.001         | 2.67[1.70;4.19]            | <0.001         |
| Radiotherapy:           |               |               |                            |                |                            |                |
| No                      | 104 (80.0%)   | 227 (88.0%)   | Ref.                       | Ref.           | Ref.                       | Ref.           |
| Yes                     | 26 (20.0%)    | 31 (12.0%)    | 0.57 [0.39;0.82]           | 0.003          | 0.55[0.37;0.80]            | 0.002          |
| Chemotherapy:           |               |               |                            |                |                            |                |
| No                      | 73 (56.2%)    | 166 (64.3%)   | Ref.                       | Ref.           | Ref.                       | Ref.           |
| Yes                     | 57 (43.8%)    | 92 (35.7%)    | 0.61 [0.48;0.79]           | <0.001         | 0.41[0.31;0.54]            | <0.001         |
| Grade:                  |               |               |                            |                |                            |                |
| Well-Moderately         | 93 (71.5%)    | 155 (60.1%)   | Ref.                       | Ref.           | Ref.                       | Ref.           |
| Poorly-Undifferentially | 37 (28.5%)    | 103 (39.9%)   | 1.48 [1.15;1.90]           | 0.002          | 1.61[1.25;2.08]            | <0.001         |
| Gender:                 |               |               |                            |                |                            |                |

|           |             |             |                  |        |                 |        |
|-----------|-------------|-------------|------------------|--------|-----------------|--------|
| Female    | 69 (53.1%)  | 129 (50.0%) | Ref.             | Ref.   |                 |        |
| Male      | 61 (46.9%)  | 129 (50.0%) | 1.14 [0.89;1.45] | 0.309  |                 |        |
| Surgery:  |             |             |                  |        |                 |        |
| No        | 32 (24.6%)  | 162 (62.8%) | Ref.             | Ref.   | Ref.            | Ref.   |
| Yes       | 98 (75.4%)  | 96 (37.2%)  | 0.28 [0.21;0.36] | <0.001 | 0.22[0.16;0.29] | <0.001 |
| Race:     |             |             |                  |        |                 |        |
| White     | 107 (82.3%) | 206 (79.8%) | Ref.             | Ref.   |                 |        |
| Non-White | 23 (17.7%)  | 52 (20.2%)  | 1.13 [0.83;1.53] | 0.43   |                 |        |

---

TableS14 Univariate and multivariate cox results table for above 70 years old patients of ICC for cancer-specific survival

|                         | No event     | Event         | Univariable                |                 | Multivariable              |                 |
|-------------------------|--------------|---------------|----------------------------|-----------------|----------------------------|-----------------|
|                         | <i>N</i> =97 | <i>N</i> =187 | <i>HR</i> (95% <i>CI</i> ) | <i>p</i> -value | <i>HR</i> (95% <i>CI</i> ) | <i>p</i> -value |
| TNM:                    |              |               |                            |                 |                            |                 |
| IA                      | 26 (26.8%)   | 17 (9.09%)    | Ref.                       | Ref.            | Ref.                       | Ref.            |
| IB                      | 14 (14.4%)   | 36 (19.3%)    | 2.18 [1.22;3.88]           | 0.008           | 1.69[0.95;3.03]            | 0.075           |
| II                      | 32 (33.0%)   | 76 (40.6%)    | 2.66 [1.57;4.51]           | <0.001          | 2.08[1.22;3.54]            | 0.007           |
| IIIA                    | 0 (0.00%)    | 3 (1.60%)     | 4.77 [1.39;16.4]           | 0.013           | 1.86[0.54;6.46]            | 0.327           |
| IIIB                    | 25 (25.8%)   | 55 (29.4%)    | 2.69 [1.56;4.65]           | <0.001          | 3.01[1.73;5.24]            | <0.001          |
| Radiotherapy:           |              |               |                            |                 |                            |                 |
| No                      | 86 (88.7%)   | 169 (90.4%)   | Ref.                       | Ref.            |                            |                 |
| Yes                     | 11 (11.3%)   | 18 (9.63%)    | 0.74 [0.45;1.20]           | 0.216           |                            |                 |
| Chemotherapy:           |              |               |                            |                 |                            |                 |
| No                      | 62 (63.9%)   | 129 (69.0%)   | Ref.                       | Ref.            | Ref.                       | Ref.            |
| Yes                     | 35 (36.1%)   | 58 (31.0%)    | 0.69 [0.51;0.94]           | 0.019           | 0.47[0.34;0.65]            | <0.001          |
| Grade:                  |              |               |                            |                 |                            |                 |
| Well-Moderately         | 65 (67.0%)   | 113 (60.4%)   | Ref.                       | Ref.            |                            |                 |
| Poorly-Undifferentially | 32 (33.0%)   | 74 (39.6%)    | 1.16 [0.86;1.55]           | 0.327           |                            |                 |
| Gender:                 |              |               |                            |                 |                            |                 |

|           |            |             |                  |        |                 |        |
|-----------|------------|-------------|------------------|--------|-----------------|--------|
| Female    | 50 (51.5%) | 87 (46.5%)  | Ref.             | Ref.   |                 |        |
| Male      | 47 (48.5%) | 100 (53.5%) | 1.13 [0.85;1.51] | 0.396  |                 |        |
| Surgery:  |            |             |                  |        |                 |        |
| No        | 22 (22.7%) | 120 (64.2%) | Ref.             | Ref.   | Ref.            | Ref.   |
| Yes       | 75 (77.3%) | 67 (35.8%)  | 0.24 [0.17;0.33] | <0.001 | 0.21[0.34;0.65] | <0.001 |
| Race:     |            |             |                  |        |                 |        |
| White     | 82 (84.5%) | 148 (79.1%) | Ref.             | Ref.   |                 |        |
| Non-White | 15 (15.5%) | 39 (20.9%)  | 1.25 [0.88;1.78] | 0.22   |                 |        |

---



TableS15 Univariate and multivariate cox results table for above 75 years old patients of ICC for cancer-specific survival

|                         | No event     | Event         | Univariable                |                | Multivariable              |                |
|-------------------------|--------------|---------------|----------------------------|----------------|----------------------------|----------------|
|                         | <i>N</i> =49 | <i>N</i> =103 | <i>HR</i> (95% <i>CI</i> ) | <i>p-value</i> | <i>HR</i> (95% <i>CI</i> ) | <i>p-value</i> |
| TNM:                    |              |               |                            |                |                            |                |
| IA                      | 12 (24.5%)   | 10 (9.71%)    | Ref.                       | Ref.           | Ref.                       | Ref.           |
| IB                      | 8 (16.3%)    | 22 (21.4%)    | 1.96 [0.93;4.15]           | 0.077          | 1.48[0.70;3.14]            | 0.31           |
| II                      | 15 (30.6%)   | 40 (38.8%)    | 2.41 [1.20;4.84]           | 0.013          | 1.76[0.87;3.55]            | 0.115          |
| IIIA                    | 0 (0.00%)    | 2 (1.94%)     | 2.58 [0.56;11.8]           | 0.223          | 0.88[0.19;4.11]            | 0.868          |
| IIIB                    | 14 (28.6%)   | 29 (28.2%)    | 2.52 [1.22;5.21]           | 0.013          | 2.20[1.05;4.58]            | 0.036          |
| Radiotherapy:           |              |               |                            |                |                            |                |
| No                      | 46 (93.9%)   | 99 (96.1%)    | Ref.                       | Ref.           |                            |                |
| Yes                     | 3 (6.12%)    | 4 (3.88%)     | 0.62 [0.23;1.69]           | 0.351          |                            |                |
| Chemotherapy:           |              |               |                            |                |                            |                |
| No                      | 38 (77.6%)   | 90 (87.4%)    | Ref.                       | Ref.           | Ref.                       | Ref.           |
| Yes                     | 11 (22.4%)   | 13 (12.6%)    | 0.55 [0.31;0.99]           | 0.047          | 0.46[0.25;0.83]            | 0.01           |
| Grade:                  |              |               |                            |                |                            |                |
| Well-Moderately         | 37 (75.5%)   | 69 (67.0%)    | Ref.                       | Ref.           |                            |                |
| Poorly-Undifferentially | 12 (24.5%)   | 34 (33.0%)    | 1.35 [0.89;2.04]           | 0.155          |                            |                |
| Gender:                 |              |               |                            |                |                            |                |

|           |            |            |                  |        |                 |        |
|-----------|------------|------------|------------------|--------|-----------------|--------|
| Female    | 28 (57.1%) | 54 (52.4%) | Ref.             | Ref.   |                 |        |
| Male      | 21 (42.9%) | 49 (47.6%) | 1.13 [0.77;1.66] | 0.542  |                 |        |
| Surgery:  |            |            |                  |        |                 |        |
| No        | 13 (26.5%) | 63 (61.2%) | Ref.             | Ref.   | Ref.            | Ref.   |
| Yes       | 36 (73.5%) | 40 (38.8%) | 0.24 [0.16;0.37] | <0.001 | 0.23[0.25;0.83] | <0.001 |
| Race:     |            |            |                  |        |                 |        |
| White     | 37 (75.5%) | 73 (70.9%) | Ref.             | Ref.   |                 |        |
| Non-White | 12 (24.5%) | 30 (29.1%) | 1.38 [0.90;2.12] | 0.139  |                 |        |

---

TableS16 Estimated 2-year survival rates of surgery and non-surgery groups for ICC patients above 80 years old

|     |             | Above 80 years old |                 |
|-----|-------------|--------------------|-----------------|
|     |             | 2-Year             |                 |
|     |             | Estimated rate (%) | <i>P</i> -value |
| OS  | Non-surgery | 5.8(0.6-10.9)      | <0.01           |
|     | Surgery     | 50.4(61.0-39.8)    |                 |
| CSS | Non-surgery | 8.3(1.1-15.5)      | <0.01           |
|     | Surgery     | 50.4(61.0-39.8)    |                 |

TableS17 Estimated 3-month and 6-month survival rates of surgery and non-surgery groups for ICC patients above 80 years old

|             |  | M0                 |                 |                    |                 | N0                 |                 |                    |                 |
|-------------|--|--------------------|-----------------|--------------------|-----------------|--------------------|-----------------|--------------------|-----------------|
|             |  | 3-Month            |                 | 6-Month            |                 | 3-Month            |                 | 6-Month            |                 |
|             |  | Estimated rate (%) | <i>P</i> -value |
| OS          |  |                    | <0.001          |                    | <0.001          |                    | <0.001          |                    | <0.001          |
| Non-surgery |  | 53.9(44.1-63.63)   |                 | 26.9(18.2-35.6)    |                 | 58.0(47.3-68.7)    |                 | 24.1(14.7-33.48)   |                 |
| Surgery     |  | 92.3(87.1-97.5)    |                 | 84.6(76.8-91.7)    |                 | 95.5(91.1-99.9)    |                 | 86.4(79.1-93.7)    |                 |
| CSS         |  |                    | <0.001          |                    | <0.001          |                    | <0.001          |                    | <0.001          |
| Non-surgery |  | 56.4(46.5-66.3)    |                 | 38.7(28.7-48.7)    |                 | 58.0(47.3-68.7)    |                 | 29.0(19.1-38.9)    |                 |
| Surgery     |  | 92.3(87.1-97.5)    |                 | 84.6(77.5-91.7)    |                 | 95.5(91.1-99.9)    |                 | 86.4(79.1-93.7)    |                 |

Figure S1 Flowchart of Patient Selection.

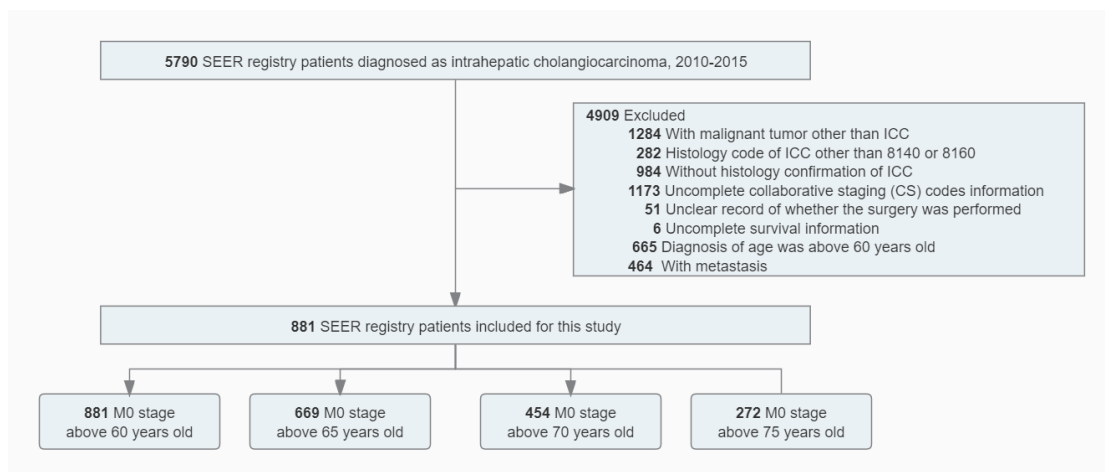

SEER, Surveillance, Epidemiology, and End Results; ICC, intrahepatic cholangiocarcinoma; M0, non-distant metastasis; N0, lymph node-negative; N1, lymph node-positive.

FigureS2 Forest plot and summary statistics of the surgery influence on intrahepatic cholangiocarcinoma incidence for OS in ICC.

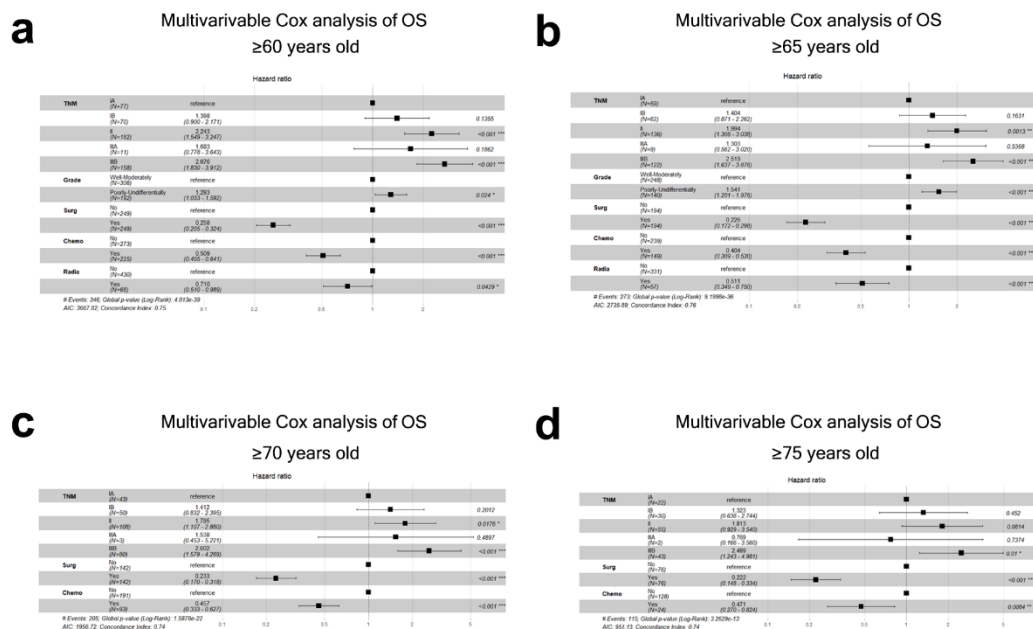

Multivariable Cox regression analysis for OS above 60 years old (a), above 65 years old (b), above 70 years old (c) and above 75 years old (d). Abbreviations: ICC, intrahepatic cholangiocarcinoma; OS, overall survival.

FigureS3 Forest plot and summary statistics of the surgery influence on intrahepatic cholangiocarcinoma incidence for CSS in ICC.

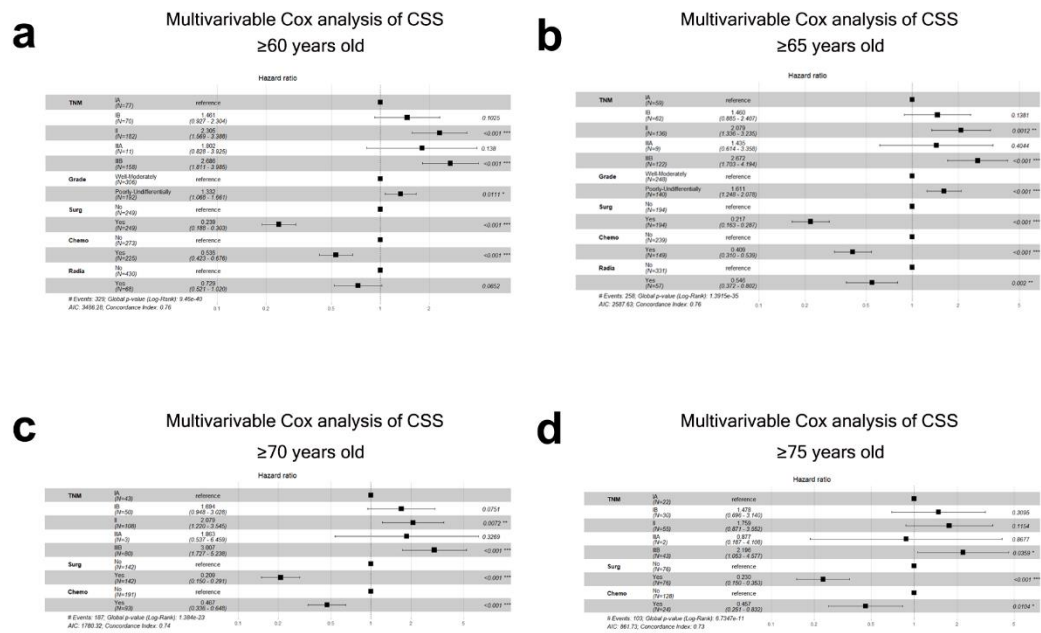

Multivariable Cox regression analysis for OS above 60 years old (a), above 65 years old (b), above 70 years old (c) and above 75 years old (d). Abbreviations: ICC, intrahepatic cholangiocarcinoma; CSS cancer-specific survival.
